# Supplementary material for: Antimicrobial Resistance Gene Detection and Plasmid Typing Among Multidrug Resistant Enterococci Isolated from Freshwater Environment
Source: Microorganisms. 2020 Sep 2;8(9):1338. doi: 10.3390/microorganisms8091338 (PMC7563215; doi:10.3390/microorganisms8091338)
Supplement: Supplementary file 1 [file microorganisms-08-01338-s001.xlsx]

## Sheet: Table S1
Table S1. Primers used for the identification of AR genes in MDR enterococci from surface water
Antimicrobial	Target gene	F primer sequence (5ʹ to 3ʹ)	R primer sequence (5ʹ to 3ʹ)
Aminoglycosides	aac(6ʹ)-Ii	TGGCCGGAAGAATATGGAGA	GCATTTGGTAAGACACCTACG
	aac(6ʹ)-Ie-aph(2ʺ)-Ia	CCAAGAGCAATAAGGGCATACC	ACCCTCAAAAACTGTTGTTGC
	aph(2ʺ)-Ib	TATGGATCCATGGTTAACTTGGACGCTGAG	ATTAAGCTTCCTGCTAAAATATAAACATCTCTGCT
	aph(2ʺ)-Ic	ATACAATCCGTCGAGTCGCT	GTTGGCCTTATCCTCTTCCA
	aph(2ʺ)-Id	GGTGGTTTTTACAGGAATGCCATC	CCCTCTTCATACCAATCCATATAACC
	aph(3ʹ)-IIIa	CTGATCGAAAAATACCGCT	ACAATCCGATATGTCGATGGAG
	ant(3ʺ)-Ia	TGATTTGCTGGTTACGGTGAC	CGCTATGTTCTCTTGCTTTTG
	ant(4ʹ)-Ia	GGAAGCAGAGTTCAGCCATG	TGCCTGCATATTCAAACAGC
	ant(6)-Ia	CGGGAGAATGGGAGACTTTG	CTGTGGCTCCACAATCTGAT
	ant(9)-Ia	GGTTCAGCAGTAAATGGTGGT	TGCCACATTCGAGCTAGGGTT
Ciproﬂoxacin	qnrEnt. Faecalis	CCTACTCCATGGATGAAACCTTTG	AAAATCTCGAGTGTAATCACCAAACC
Macrolides	erm(A)	TCTAAAAAGCATGTAAAAGAA	CTTCGATAGTTTATTAATATTAGT
	erm(B)	GAAAAGGTACTCAACCAAATA	AGTAACGGTACTTAAATTGTTTAC
	erm(C)	TCAAAACATAATATAGATAAA	GCTAATATTGTTTAAATCGTCAAT
Lincosamides	lnu(A)	GGTGGCTGGGGGGTAGATGTATTAACTGG	GCTTCTTTTGAAATACATGGTATTTTTCGATC
	lnu(B)	CCTACCTATTGTTTGTGGAA	ATAACGTTACTCTCCTATTC
Quinupristin/Dalfopristin (Q/D)	vat(A)	TGGAGTGTGACAAGATAGGC	GTGACAACAGCTTCTGCAGC
	vat(B)	GGCCCTGATCCAAATAGCAT	GTGCTGACCAATCCCACCAT
	vat(C)	ATGAATTCGCAAAATCAGCAAGG	TCGTCTCGAGCTCTAGGTCC
	vat(D)	GCTCAATAGGACCAGGTGTA	TCCAGCTAACATGTATGGCG
	vat(E)	ACTATACCTGACGCAAATGC	GGTTCAAATCTTGGTCCG
Tetracycline	tet(K)	GTAGCGACAATAGGTAATAGT	GTAGTGACAATAAACCTCCTA
	tet(L)	GTMGTTGCGCGCTATATTCC	GTGAAMGRWAGCCCACCTAA
	tet(M)	GAACTCGAACAAGAGGAAAGC	ATGGAAGCCCAGAAAGGAT
	tet(S)	ATTGCAGAACTTGAAAAGGA	CATTTGGACCTCACCTAAAA
	tet(O)	AACTTAGGCATTCTGGCTCAC	TCCCACTGTTCCATATCGTCA
	tet(U)	ATGCAGCTAAGACGTGGC	TTATTCGGTATCACTTCTCTGTC
